# Supplementary material for: Nanosensitizer-mediated augmentation of sonodynamic therapy efficacy and antitumor immunity
Source: Springer Nature journal article supplement (doi:10.1038/s41467-023-42509-7), 2023-11-01
Supplement: MOESM1 [file 41467_2023_42509_MOESM1_ESM.pdf]

## Supporting information

# **Nanosensitizer-mediated augmentation of sonodynamic therapy efficacy and antitumor immunity**

Yongjiang Li<sup>1,#</sup>, Wei Chen<sup>1,#</sup>, Yong Kang<sup>2</sup>, Xueyan Zhen<sup>1</sup>, Zhuoming Zhou<sup>1</sup>, Chuang Liu<sup>1</sup>, Shuying Chen<sup>1</sup>, Xiangang Huang<sup>1</sup>, Hai-Jun Liu<sup>1</sup>, Seyoung Koo<sup>1</sup>, Na Kong<sup>1,3,4</sup>, Xiaoyuan Ji<sup>2,4</sup>, Tian Xie<sup>4,5,6,7,\*</sup>, Wei Tao<sup>1,\*</sup>

<sup>1</sup> Center for Nanomedicine and Department of Anesthesiology, Brigham and Women's Hospital, Harvard Medical School, Boston, MA 02115, USA

<sup>2</sup> Academy of Medical Engineering and Translational Medicine, Medical College, Tianjin University, Tianjin, 300072, China

<sup>3</sup> Liangzhu Laboratory, Zhejiang University Medical Center, Hangzhou, China

<sup>4</sup> School of Pharmacy, Hangzhou Normal University, Hangzhou, Zhejiang, 311121, China

<sup>5</sup> Key Laboratory of Elemene Class Anti-Cancer Chinese Medicines, Hangzhou Normal University, Hangzhou, Zhejiang, 311121, China

<sup>6</sup> Engineering Laboratory of Development and Application of Traditional Chinese Medicines, Hangzhou Normal University, Hangzhou, Zhejiang, 311121, China

<sup>7</sup> Collaborative Innovation Center of Traditional Chinese Medicines of Zhejiang Province, Hangzhou Normal University, Hangzhou, Zhejiang, 311121, China

# These authors contributed equally to this work: Yongjiang Li, Wei Chen

\* To whom correspondence may be addressed.

Email: tianxie@hznu.edu.cn (T.X.); wtao@bwh.harvard.edu (W.T.)

## Contents

**Supplementary Figure 1.** Size distribution, zeta potential and dispersibility of SnSNPs@PEG.

**Supplementary Figure 2.** XPS survey spectrum of SnSNPs.

**Supplementary Figure 3.** UV–Vis absorbance spectra of the time-dependent oxidation of DPBF ( $80\text{ }\mu\text{g mL}^{-1}$  in ethanol) by the following treatment: (a) US (1 MHz,  $1\text{ W cm}^{-2}$ , 50% duty cycle) only, and (b) SnSNPs@PEG ( $200\text{ }\mu\text{g mL}^{-1}$ ) only.

**Supplementary Figure 4.** UV–Vis absorbance spectra of the time-dependent oxidation of MB ( $5\text{ }\mu\text{g mL}^{-1}$  in PBS) by the following treatment: (a) US (1 MHz,  $2\text{ W cm}^{-2}$ , 50% duty cycle) only, and (b)  $\text{H}_2\text{O}_2$  ( $50\text{ }\mu\text{M}$ ) + US.

**Supplementary Figure 5.** UV–Vis absorbance spectra of the time-dependent oxidation of MB ( $5\text{ }\mu\text{g mL}^{-1}$  in PBS) by the following treatment: (a) SnSNPs@PEG ( $100\text{ }\mu\text{g mL}^{-1}$ ) +  $\text{H}_2\text{O}_2$  ( $50\text{ }\mu\text{M}$ ), (b) SnSNPs@PEG only, and (c) SnSNPs@PEG +  $\text{H}_2\text{O}_2$  + NIR<sub>808</sub> ( $1.0\text{ W cm}^{-2}$ ).

**Supplementary Figure 6.** UV–Vis absorbance spectra of the time-dependent oxidation of GSH ( $30\text{ }\mu\text{g mL}^{-1}$  in PBS) by the following treatment: (a) SnSNPs@PEG ( $200\text{ }\mu\text{g mL}^{-1}$ ), (b) US (1 MHz,  $2\text{ W cm}^{-2}$ , 50% duty cycle) only, (c) GSH + NIR<sub>808</sub> and (d) SnSNPs@PEG + NIR<sub>808</sub> ( $1.0\text{ W cm}^{-2}$ ).

**Supplementary Figure 7.** Photothermal performance of SnSNPs@PEG.

**Supplementary Figure 8.** Relative viability of 4T1 cells after incubation with different concentrations of SnSNPs@PEG for 24 and 48 h.

**Supplementary Figure 9.** Bright-field microscope images showing time-dependent cellular uptake of SnSNPs@PEG by 4T1 cells.

**Supplementary Figure 10.** Bright-field microscope images showing 4T1 cells after various treatments.

**Supplementary Figure 11.** Time-dependent temperature increase profile in 4T1 tumor-bearing mice showing the *in vivo* photothermal effect of SnSNPs@PEG.

**Supplementary Figure 12.** Comparison of luminescence intensity of 4T1 tumor areas after various treatments.

**Supplementary Figure 13.** Change in the 4T1 tumor volume after various treatments.

**Supplementary Figure 14.** Change in body weight of 4T1 tumor-bearing mice during the SnSNPs@PEG-mediated strategy treatment.

**Supplementary Figure 15.** Spleen of 4T1 tumor-bearing mice after SnSNPs@PEG-mediated treatment strategy.

**Supplementary Figure 16.** Antitumor efficacy of SnSNPs@PEG-mediated SDT in an orthotopic RIL-175-HCC mouse model.

**Supplementary Figure 17.** Semi-quantitative analysis of green fluorescence intensity shows the ROS level in tumors after various treatments.

**Supplementary Figure 18.** Gating strategies to identify CD45<sup>+</sup>CD3<sup>+</sup>CD4<sup>+</sup> and CD45<sup>+</sup>CD3<sup>+</sup>CD8<sup>+</sup> T lymphocytes in the tumor, spleen and lymph nodes of 4T1 tumor-bearing mice following the SnSNPs@PEG-mediated treatment strategy.

**Supplementary Figure 19.** Gating strategies to identify CD45<sup>+</sup>CD3<sup>+</sup>CD4<sup>+</sup> and CD45<sup>+</sup>CD3<sup>+</sup>CD8<sup>+</sup> T lymphocytes in the RIL-175-HCC following the SnSNPs@PEG-mediated treatment strategy.

**Supplementary Figure 20.** Comparison of immune cell levels in 4T1 tumors in different groups after SnSNPs@PEG-mediated treatment strategy.

**Supplementary Figure 21.** Flow cytometry analysis of (a) CD45<sup>+</sup> cells, (b)(c) CD45<sup>+</sup>CD3<sup>+</sup> lymphocytes, CD45<sup>+</sup>CD3<sup>+</sup>CD4<sup>+</sup> T lymphocytes and CD45<sup>+</sup>CD3<sup>+</sup>CD8<sup>+</sup> T lymphocytes in RIL-175-HCC after different treatments (n = 3).

**Supplementary Figure 22.** Comparison of the levels of (a) CD45<sup>+</sup> immune cells, (b) CD45<sup>+</sup>CD3<sup>+</sup> T cells, (c) CD45<sup>+</sup>CD3<sup>+</sup>CD4<sup>+</sup> T cells, and (d) CD45<sup>+</sup>CD3<sup>+</sup>CD8<sup>+</sup> T cells in RIL-175-HCC-bearing mice after various treatments (n = 3).

**Supplementary Figure 23.** Comparison of CD45<sup>+</sup>CD3<sup>+</sup>CD8<sup>+</sup> T cell levels in spleens and lymph nodes of 4T1 tumor-bearing mice in different groups after SnSNPs@PEG-mediated treatment strategy.

**Supplementary Table 1.** Comparison of the bandgap of SnSNPs with other nanosensitizers.

**Supplementary Table 2.** Antibody used for the flow cytometry analysis of T cells.

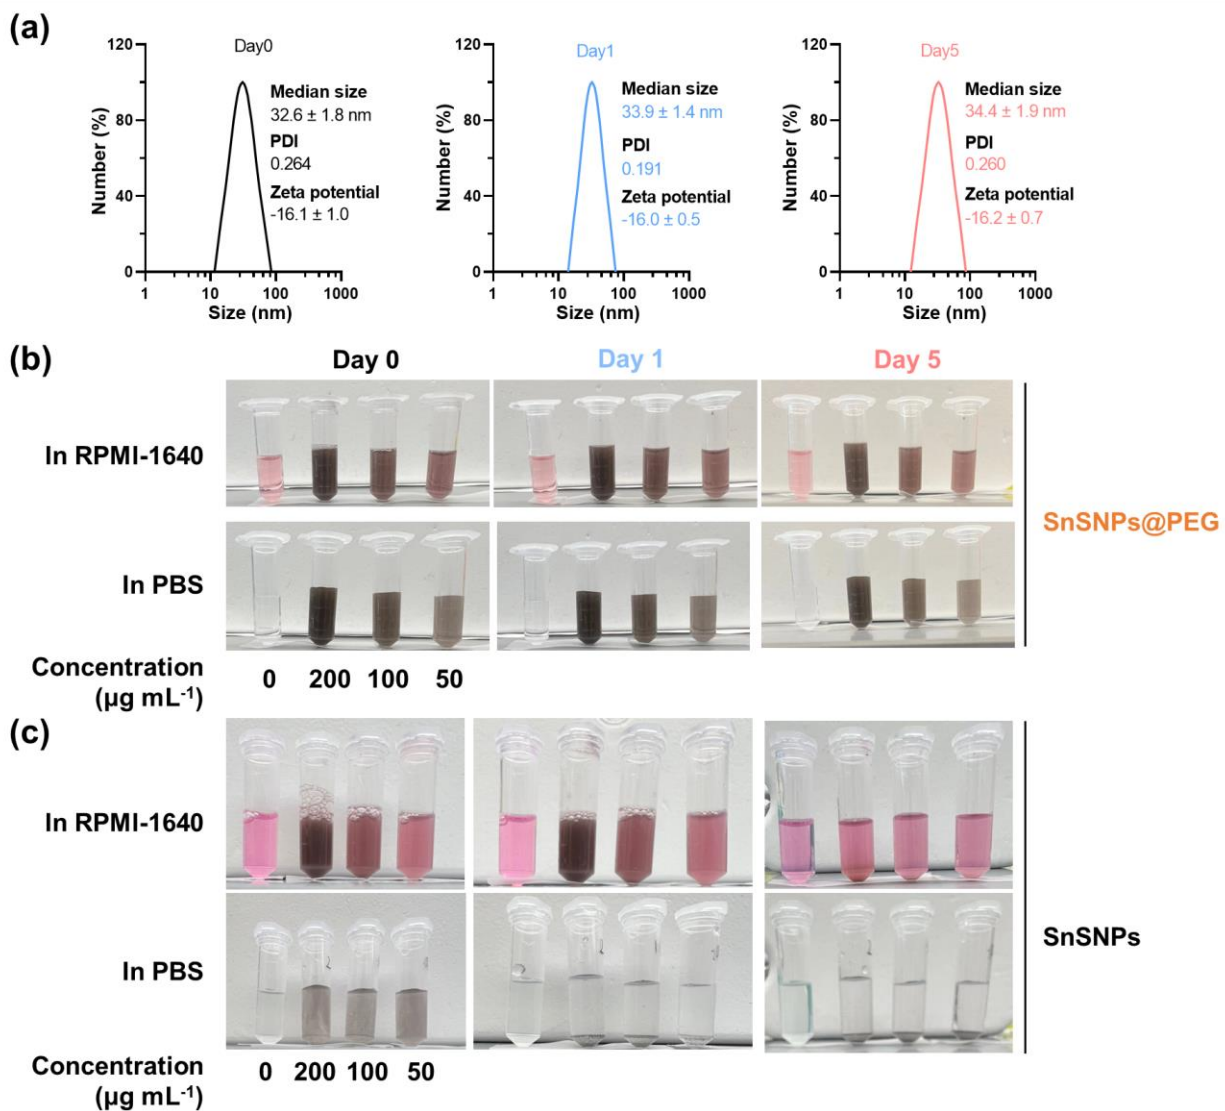

**Figure S1.** Size distribution, zeta potential and dispersibility of SnSNPs@PEG. a) DLS measurement of size distribution, and zeta potential of SnSNPs@PEG in PBS on different days. b) Photographs showing the dispersion of (b) SnSNPs@PEG and (c) SnSNPs at various concentrations in RPMI-1640 cell culture medium or PBS after incubation at 4 °C for different time intervals.

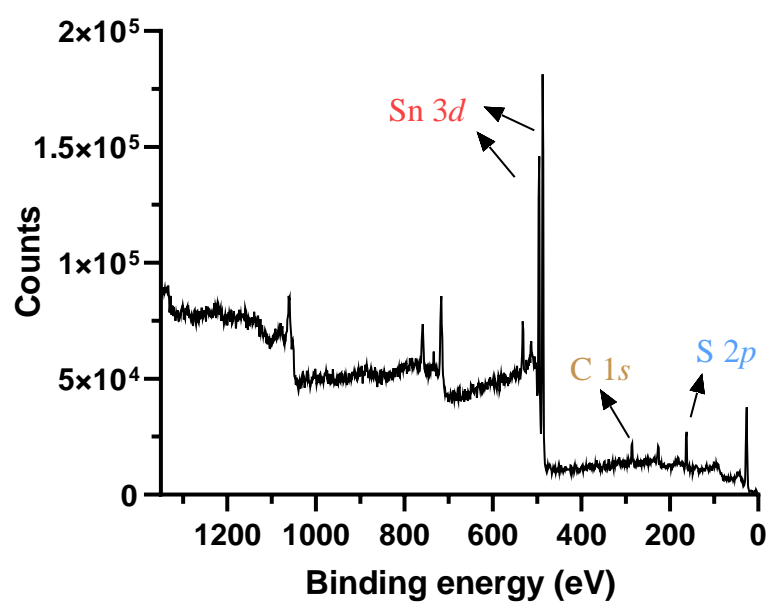

**Figure S2.** XPS survey spectrum of SnSNPs.

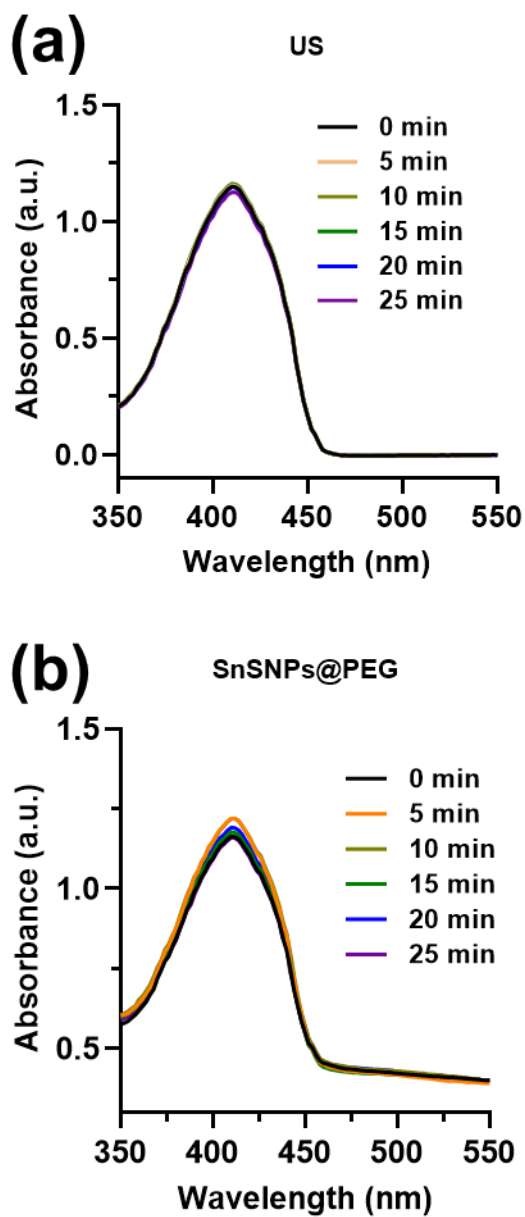

**Figure S3.** UV–Vis absorbance spectra of the time-dependent oxidation of DPBF (80  $\mu\text{g mL}^{-1}$  in ethanol) by the following treatment: (a) US (1 MHz, 1 W  $\text{cm}^{-2}$ , 50% duty cycle) only, and (b) SnSNPs@PEG (200  $\mu\text{g mL}^{-1}$ ) only.

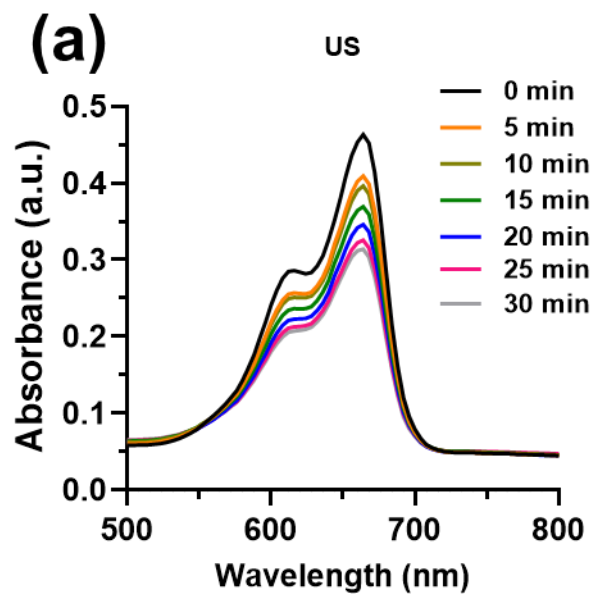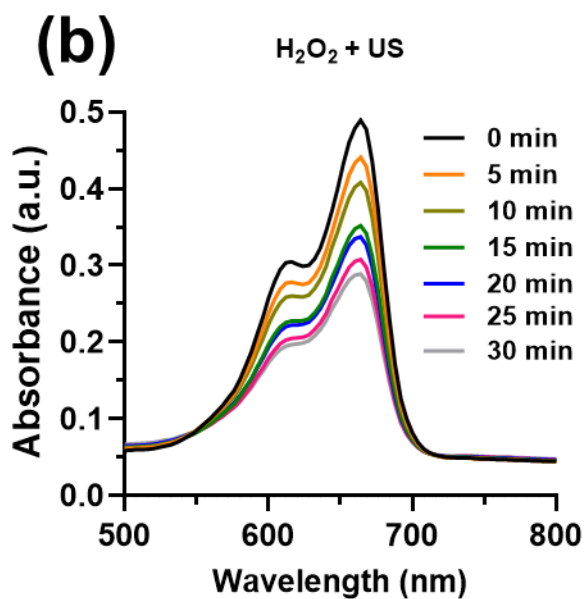

**Figure S4.** UV–Vis absorbance spectra of the time-dependent oxidation of MB ( $5 \mu\text{g mL}^{-1}$  in PBS) by the following treatment: (a) US (1 MHz, 2 W  $\text{cm}^{-2}$ , 50% duty cycle) only, and (b)  $\text{H}_2\text{O}_2$  (50  $\mu\text{M}$ ) + US.

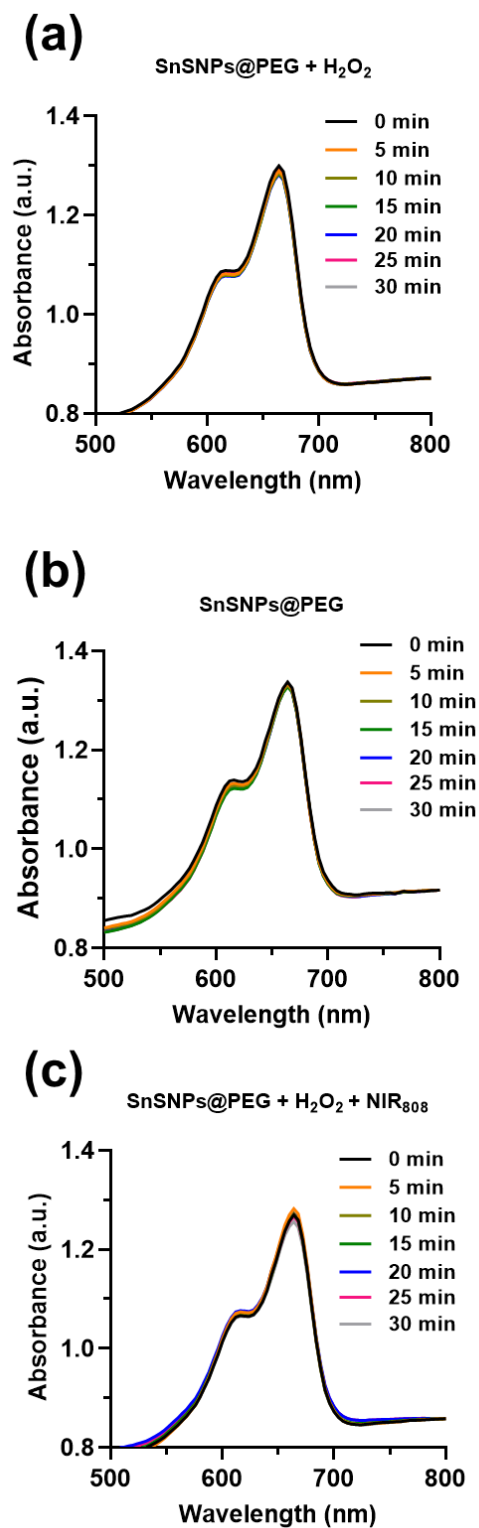

**Figure S5.** UV–Vis absorbance spectra of the time-dependent oxidation of MB ( $5 \mu\text{g mL}^{-1}$  in PBS) by the following treatment: (a)  $\text{SnSNPs@PEG}$  ( $100 \mu\text{g mL}^{-1}$ ) +  $\text{H}_2\text{O}_2$  ( $50 \mu\text{M}$ ), (b)  $\text{SnSNPs@PEG}$  only, and (c)  $\text{SnSNPs@PEG} + \text{H}_2\text{O}_2 + \text{NIR}_{808}$  ( $1.0 \text{ W cm}^{-2}$ ).



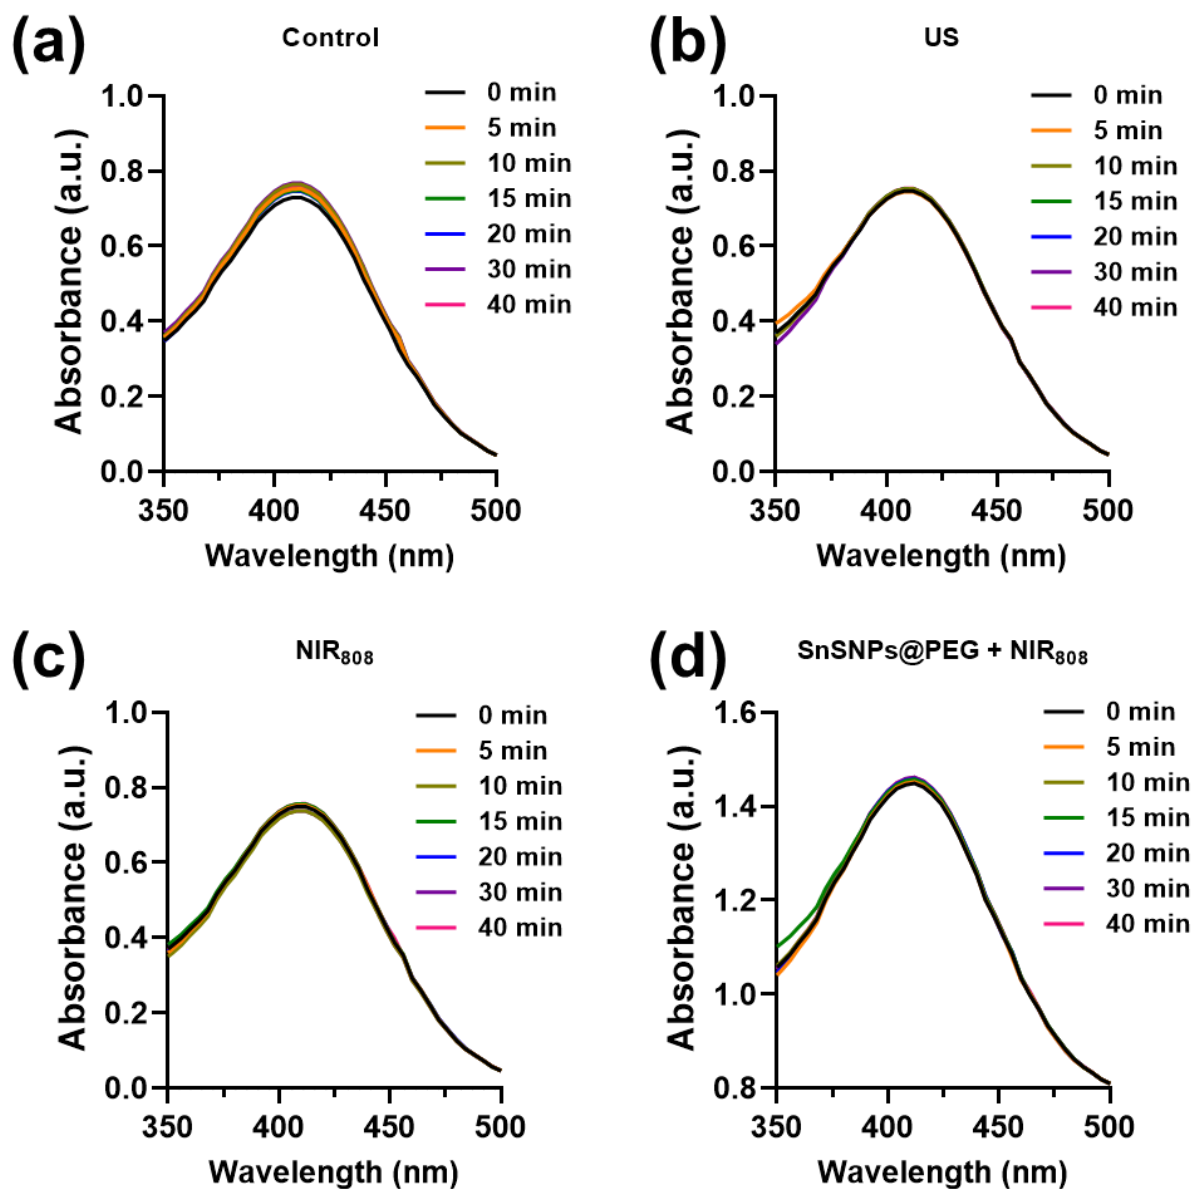

**Figure S6.** UV-Vis absorbance spectra of the time-dependent oxidation of GSH (30  $\mu\text{g mL}^{-1}$  in PBS) by the following treatment: (a) SnSNPs@PEG (200  $\mu\text{g mL}^{-1}$ ), (b) US (1 MHz, 2  $\text{W cm}^{-2}$ , 50% duty cycle) only, (c) GSH + NIR<sub>808</sub> and (d) SnSNPs@PEG + NIR<sub>808</sub> (1.0  $\text{W cm}^{-2}$ ).

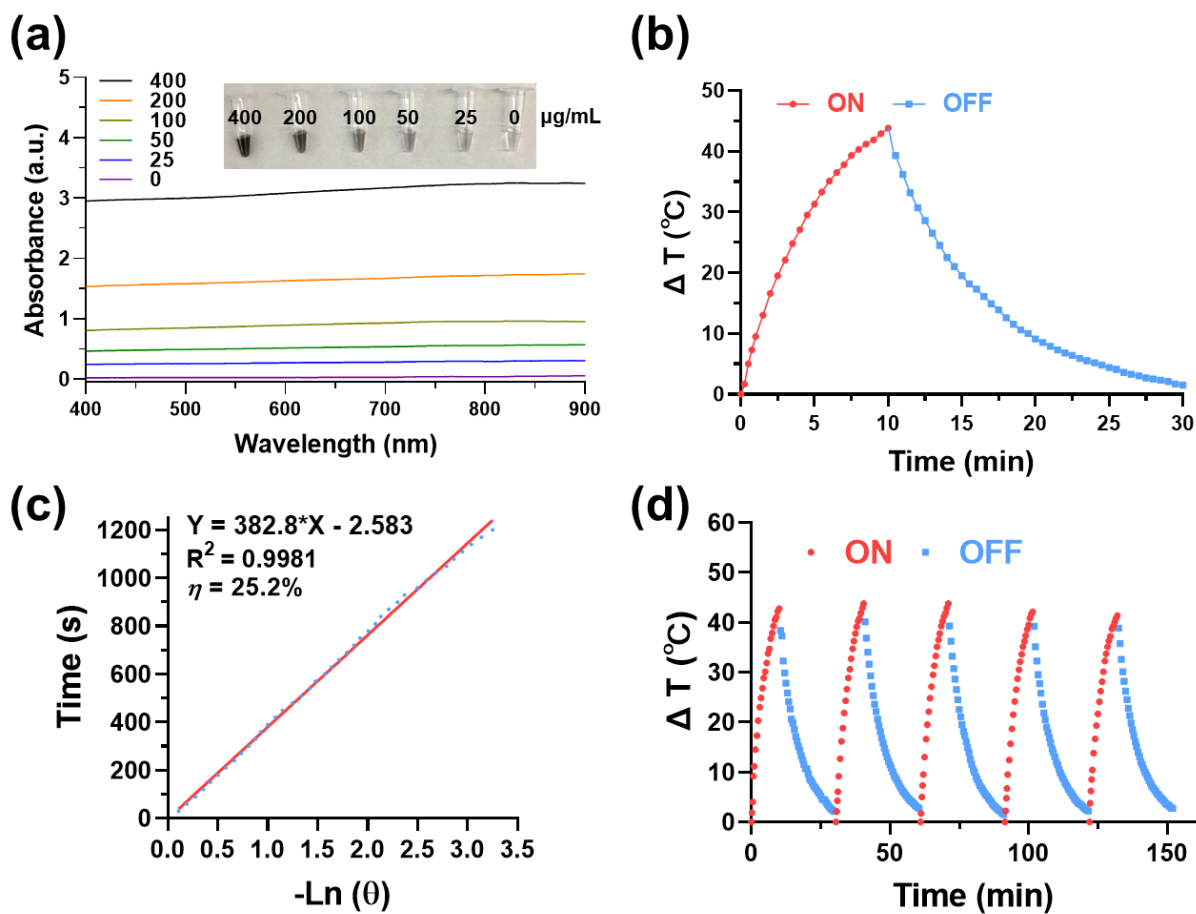

**Figure S7.** Photothermal performance of SnSNPs@PEG. a) UV-Vis-NIR absorption spectra of SnSNPs@PEG at different concentrations. Inset photo shows SnSNPs@PEG water suspension with the corresponding concentration in  $\mu\text{g mL}^{-1}$ . b) Heating and cooling profiles of SnSNPs@PEG ( $200 \mu\text{g mL}^{-1}$ ) irradiated by an 808 nm NIR laser at the power density of  $2.0 \text{ W cm}^{-2}$ . c) Linear fitting curve of time and  $-\ln(\theta)$  from the cooling profile in (b). d) Repetitive five continuous heating and cooling profiles of SnSNPs@PEG ( $200 \mu\text{g mL}^{-1}$ ) irradiated by an 808 nm NIR laser at the power density of  $2.0 \text{ W cm}^{-2}$ .

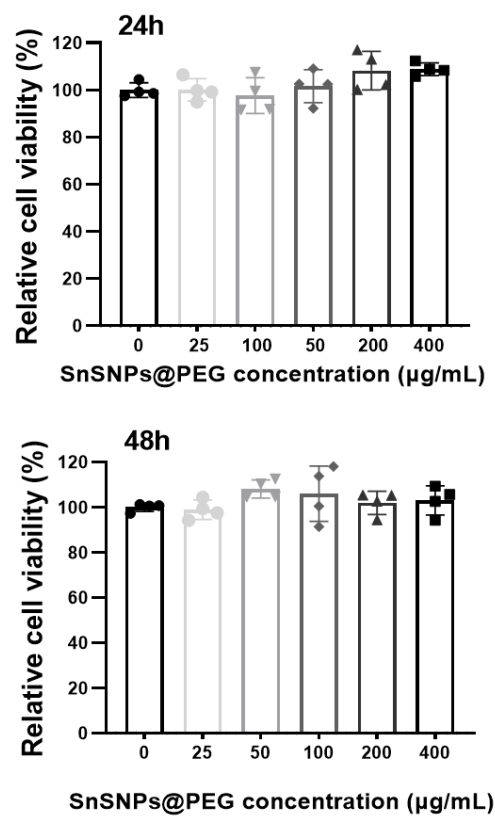

**Figure S8.** Relative viability of 4T1 cells after incubation with different concentrations of SnSNPs@PEG for 24 and 48 h. Data are from independent samples and are presented as mean  $\pm$  SD (n = 4).

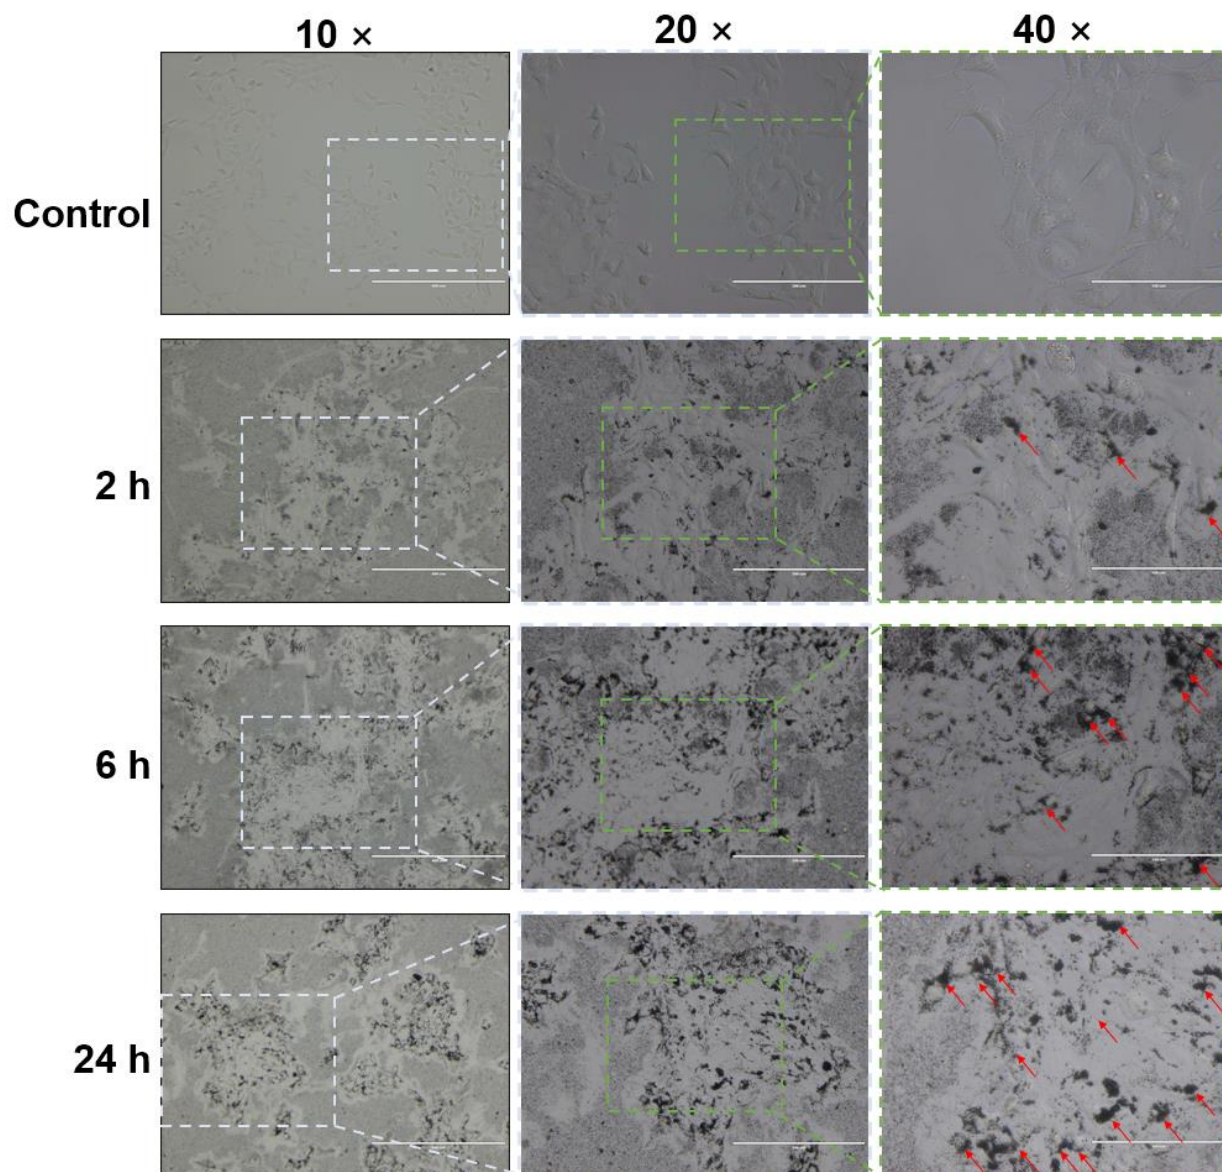

**Figure S9.** Bright-field microscope images showing time-dependent cellular uptake of SnSNPs@PEG by 4T1 cells. The substantial uptake was highlighted by red arrows. No cytotoxic effect was observed on 4T1 cells given that the substantial cellular uptake of SnSNPs@PEG was observed. Scale bar: 10 $\times$  = 400  $\mu$ m, 20 $\times$  = 200  $\mu$ m, 40 $\times$  = 100  $\mu$ m.

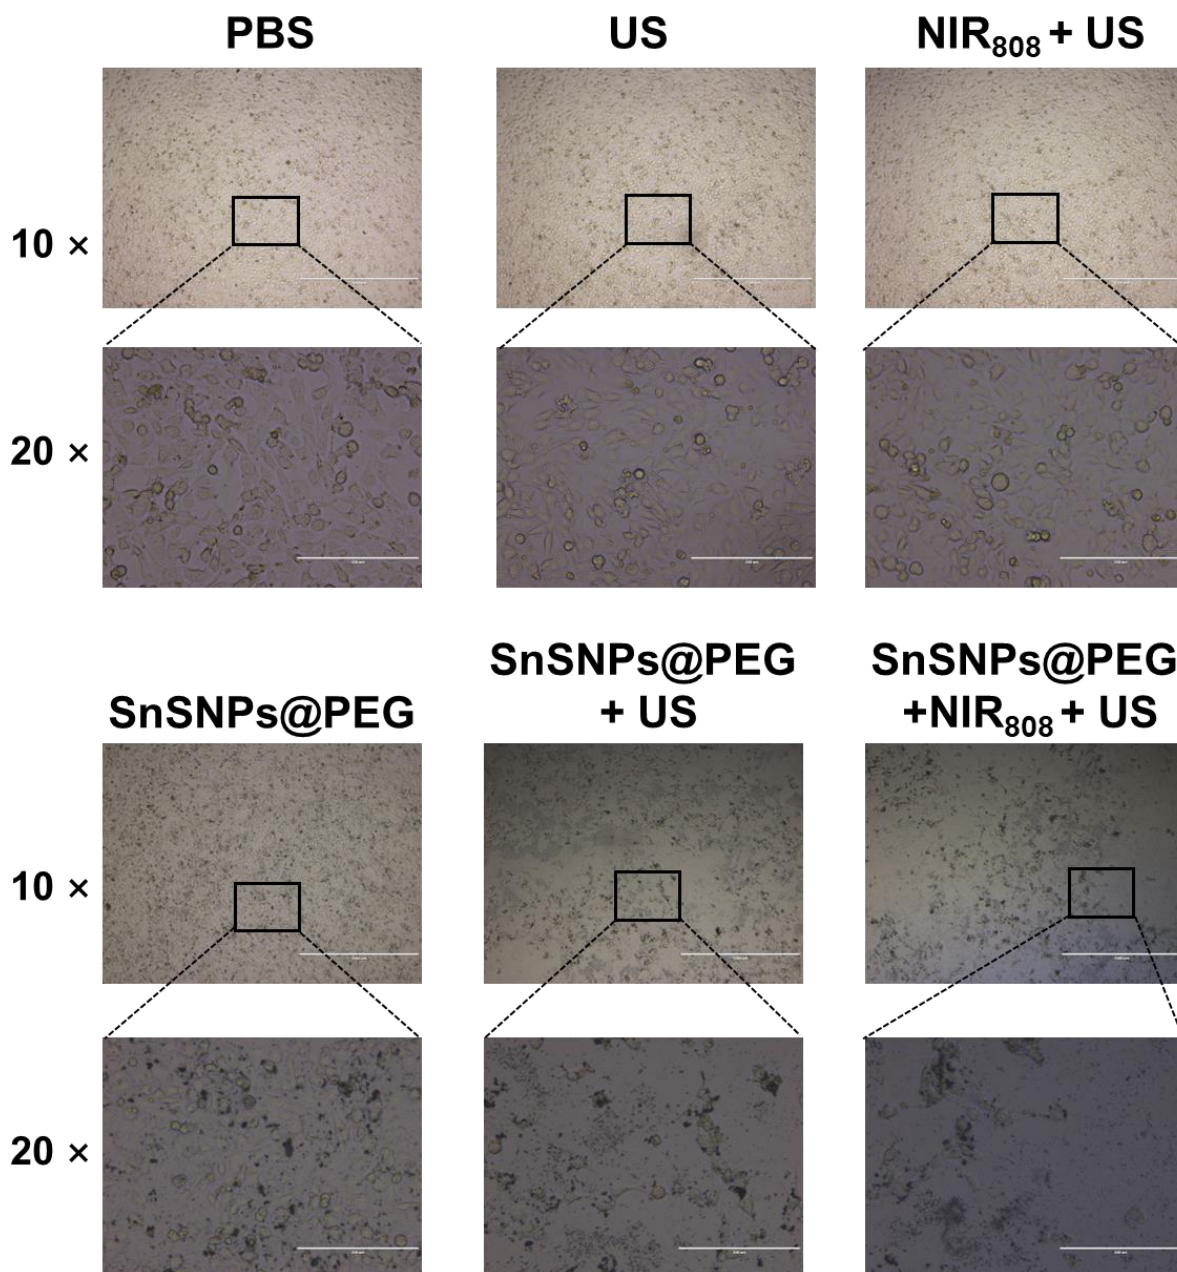

**Figure S10.** Bright-field microscope images showing 4T1 cells after various treatments. SnSNPs@PEG ( $200\ \mu\text{g mL}^{-1}$ ) with US irradiation ( $1\ \text{MHz}$ ,  $0.3\ \text{W cm}^{-2}$ , 50% duty cycle) or with NIR<sub>808</sub> ( $1.0\ \text{W cm}^{-2}$ ) + US irradiation showed substantial cytotoxic effects. Scale bar:  $10\times = 400\ \mu\text{m}$ ,  $20\times = 200\ \mu\text{m}$ .

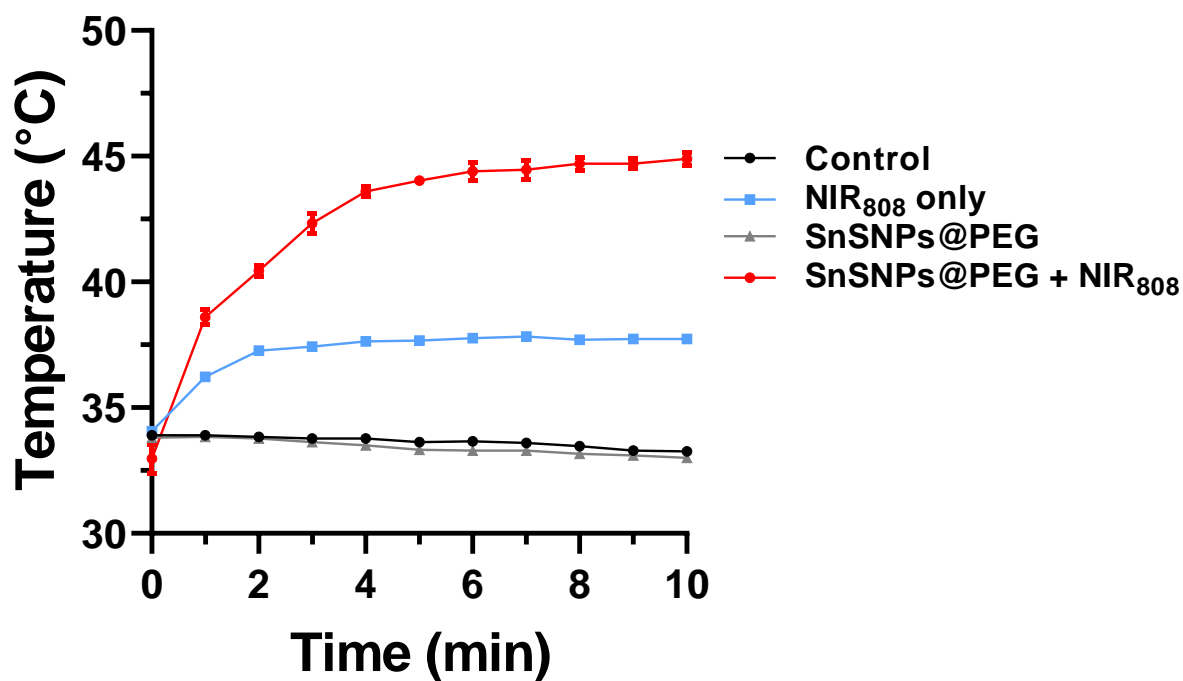

**Figure S11.** Time-dependent temperature increase profile in 4T1 tumor-bearing mice showing the *in vivo* photothermal effect of SnSNPs@PEG. Temperatures were recorded 12 h after intravenous injection of 100  $\mu\text{L}$  of PBS containing SnSNPs@PEG ( $10 \text{ mg kg}^{-1}$ ) under NIR<sub>808</sub> ( $1 \text{ W cm}^{-2}$ ) irradiation. Data are presented as mean  $\pm$  SD ( $n = 3$ ).



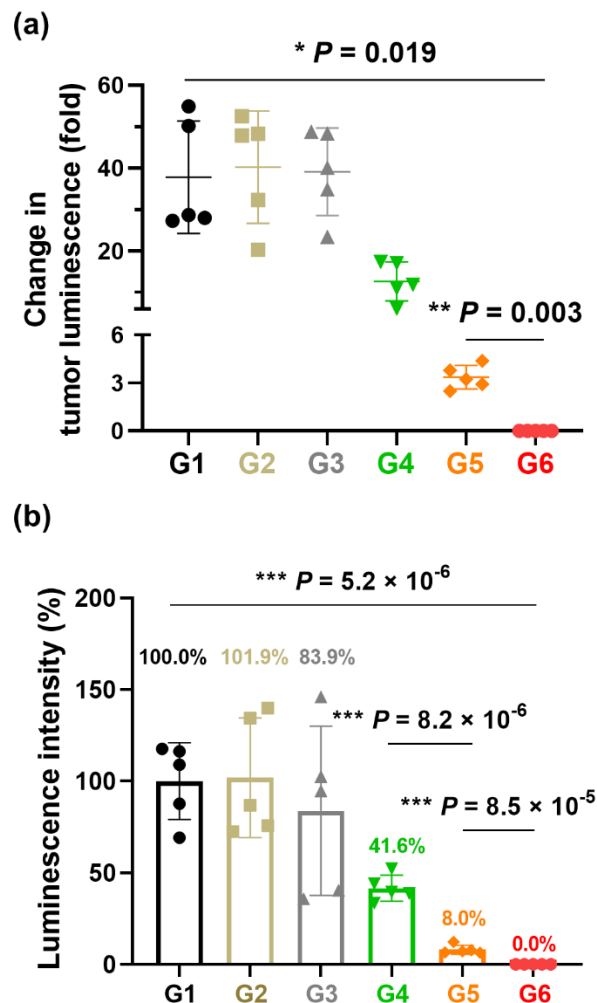

**Figure S12.** Comparison of luminescence intensity of 4T1 tumor areas after various treatments. (a) Fold-change of tumor luminescence intensity. The intensity change was calculated as luminescence intensity on Day 16/ luminescence intensity on Day 0 (before treatment). (b) Percentage of tumor luminescence intensity. The percentage was calculated as follows: luminescence intensity at Day 16 of each tumor-bearing mice in group/ average luminescence intensity of mice in G1 at Day 16. Statistical analysis between the two groups was performed using two-sided student's *t*-test.  $** P < 0.01$ ,  $*** P < 0.001$ . Groups are as follows: control (G1), SnSNPs@PEG (G2), NIR + US (G3), SnSNPs@PEG + US (G4), SnSNPs@PEG + NIR + US (G5), SnSNPs@PEG + NIR + US  $\times 2$  (G6), (n = 5).

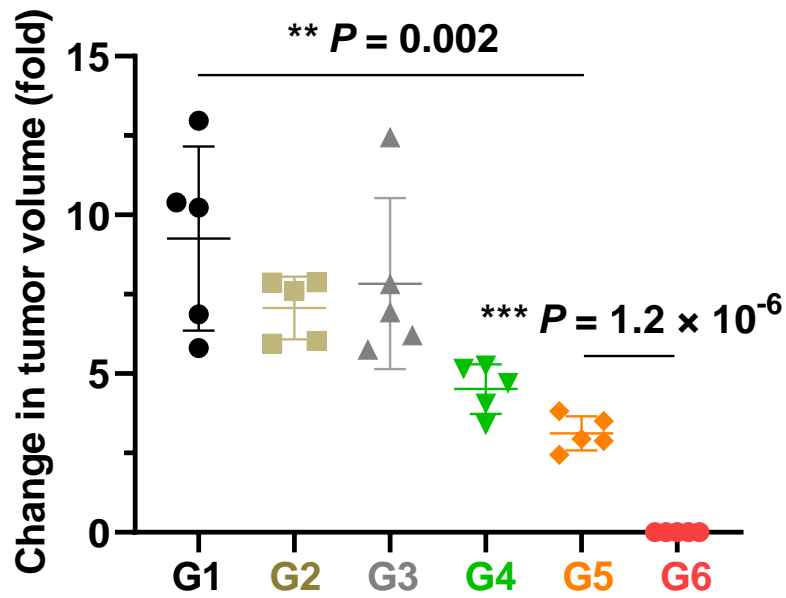

**Figure S13.** Change in the 4T1 tumor volume after various treatments. The volume change was calculated as follows: tumor volume at Day 16/ tumor volume at Day 0 (before treatment). Data are presented as mean  $\pm$  SD (n = 5). Statistical analysis between two groups was performed using two-sided student's *t*-test. \*\*  $P < 0.01$ , \*\*\*  $P < 0.001$ . Groups are as follows: control (G1), SnSNPs@PEG (G2), NIR + US (G3), SnSNPs@PEG + US (G4), SnSNPs@PEG + NIR + US (G5), SnSNPs@PEG + NIR + US  $\times$  2 (G6), (n = 5).



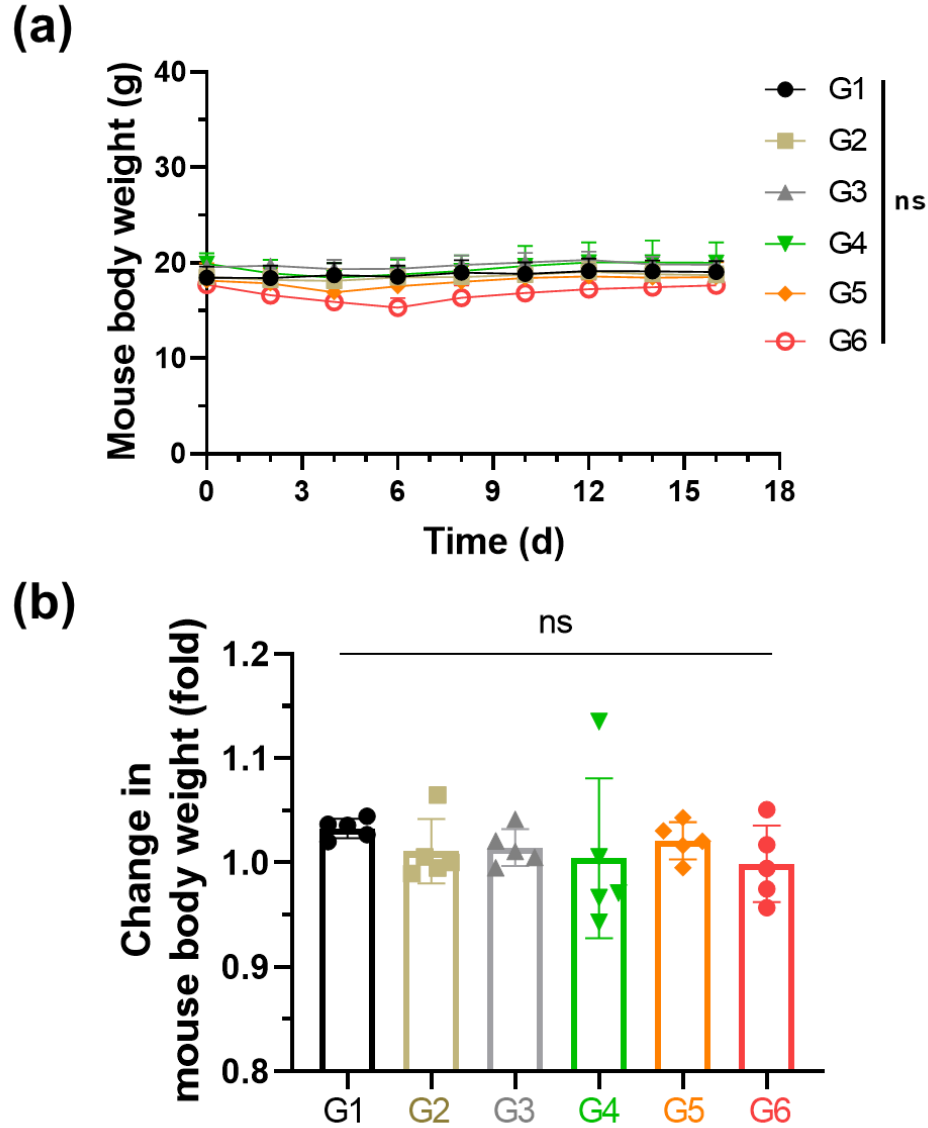

**Figure S14.** Change in body weight of 4T1 tumor-bearing mice during the SnSNPs@PEG-mediated strategy treatment. (a) Time-dependent body weight of 4T1 tumor-bearing mice of different treatment groups. (n = 5); (b) Change in mouse body weight after various treatments. The mouse body weight change was calculated as follows: mouse body weight at Day 16/ mouse body weight at Day 0 (before treatment). Data are presented as mean  $\pm$  SD (n = 5). Statistical analysis among groups was performed using one-way ANOVA test. ns, not significant. Groups are as follows: control (G1), SnSNPs@PEG (G2), NIR + US (G3), SnSNPs@PEG + US (G4), SnSNPs@PEG + NIR + US (G5), SnSNPs@PEG + NIR + US  $\times$  2 (G6), (n = 5).

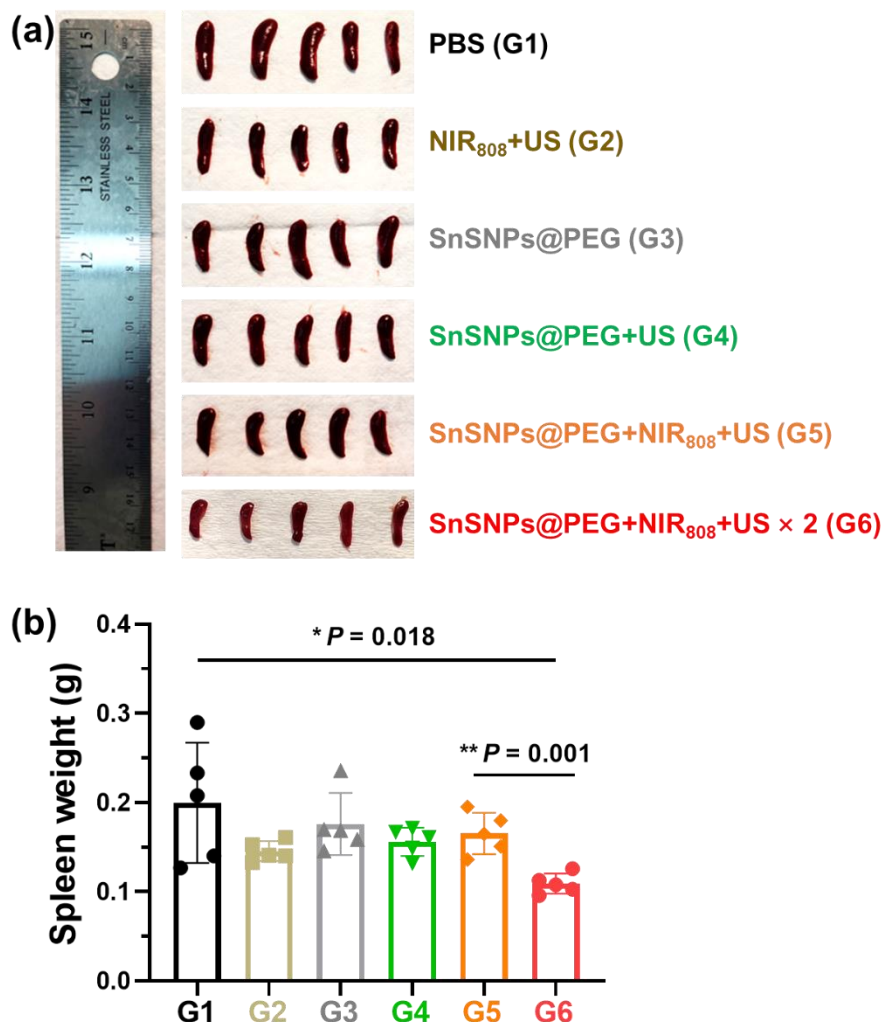

**Figure S15.** Spleen of 4T1 tumor-bearing mice after SnSNPs@PEG-mediated treatment strategy. (a) Photograph of spleens harvested from 4T1 tumor-bearing mice at Day 16 from different treatment groups ( $n = 5$ ); b) Spleen weight of 4T1 tumor-bearing mice shown in (a). Data are presented as mean  $\pm$  SD. ( $n = 5$ ). Statistical analysis between two groups was performed using student's  $t$ -test. \*  $P < 0.05$ , \*\*  $P < 0.01$ . Groups are as follows: control (G1), SnSNPs@PEG (G2), NIR + US (G3), SnSNPs@PEG + US (G4), SnSNPs@PEG + NIR + US (G5), SnSNPs@PEG + NIR + US  $\times$  2 (G6), ( $n = 5$ ).

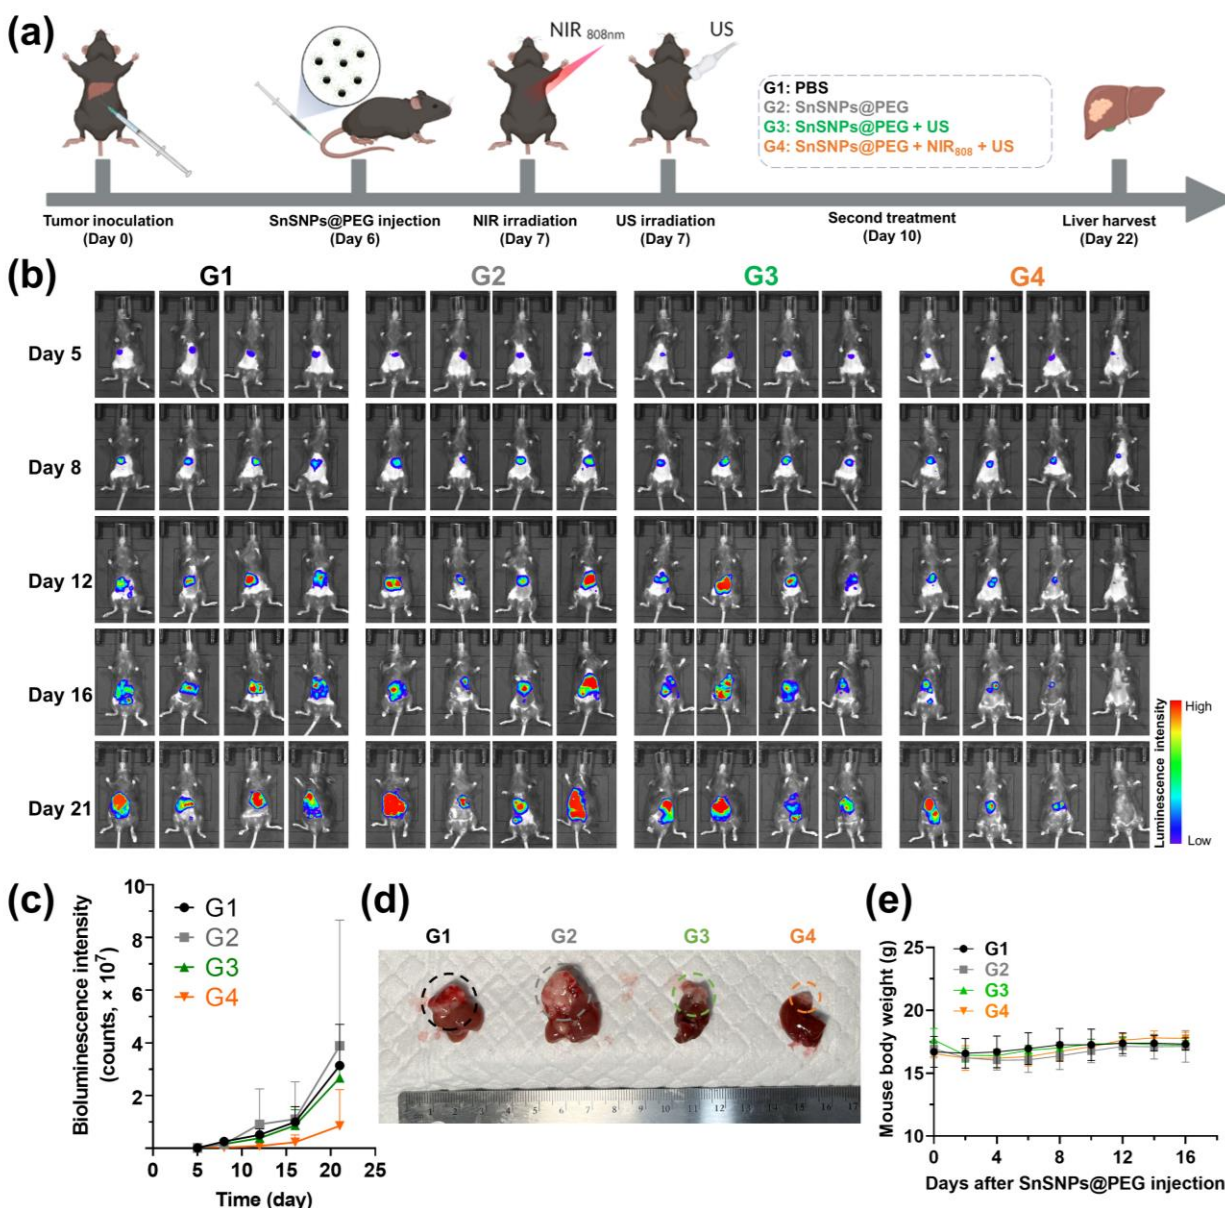

**Figure S16.** Antitumor efficacy of SnSNPs@PEG-mediated SDT in an orthotopic RIL-175-HCC mouse model. a) Experimental timeline for establishing the RIL-175-HCC mouse model and SnSNPs@PEG-mediated treatment. Illustration was created with BioRender.com. b) Bioluminescence images of orthotopic RIL-175-HCC-bearing mice before, during and after various treatments, including PBS (G1), SnSNPs@PEG (G2), SnSNPs@PEG + US (G3), and SnSNPs@PEG + NIR<sub>808</sub> + US (G4). The injection volume is 100  $\mu$ L and the dose of SnSNPs@PEG is 10 mg kg<sup>-1</sup>. c) Analysis of bioluminescence (counts) of orthotopic RIL-175-HCC-bearing mice before, during and after various treatments. Data are presented as mean  $\pm$  SD (n = 4). d) Photograph of excised livers with RIL-175-HCC after various treatments (Day 22). Tumor areas are highlighted by circles. e) Time-dependent body weight of RIL-175-HCC-bearing mice after receiving various treatments.

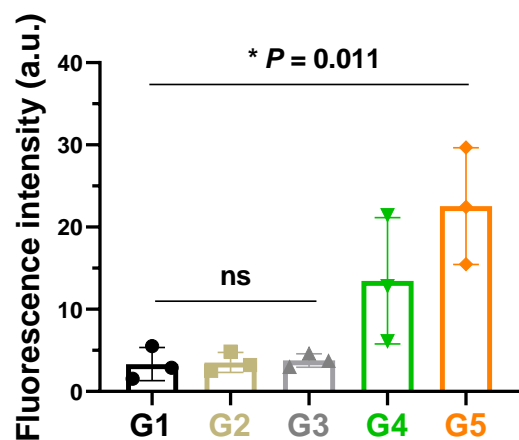

**Figure S17.** Semi-quantitative analysis of green fluorescence intensity showing the ROS level in tumors of 4T1 tumor-bearing mice after various treatments. Data are presented as mean  $\pm$  SD ( $n = 3$ ). Statistical analysis between two groups was performed using student's  $t$ -test. \*  $P < 0.05$ . Groups are as follows: control (G1), NIR + US (G2), SnSNPs@PEG (G3), SnSNPs@PEG + US (G4), SnSNPs@PEG + NIR + US (G5), ( $n = 3$ ).

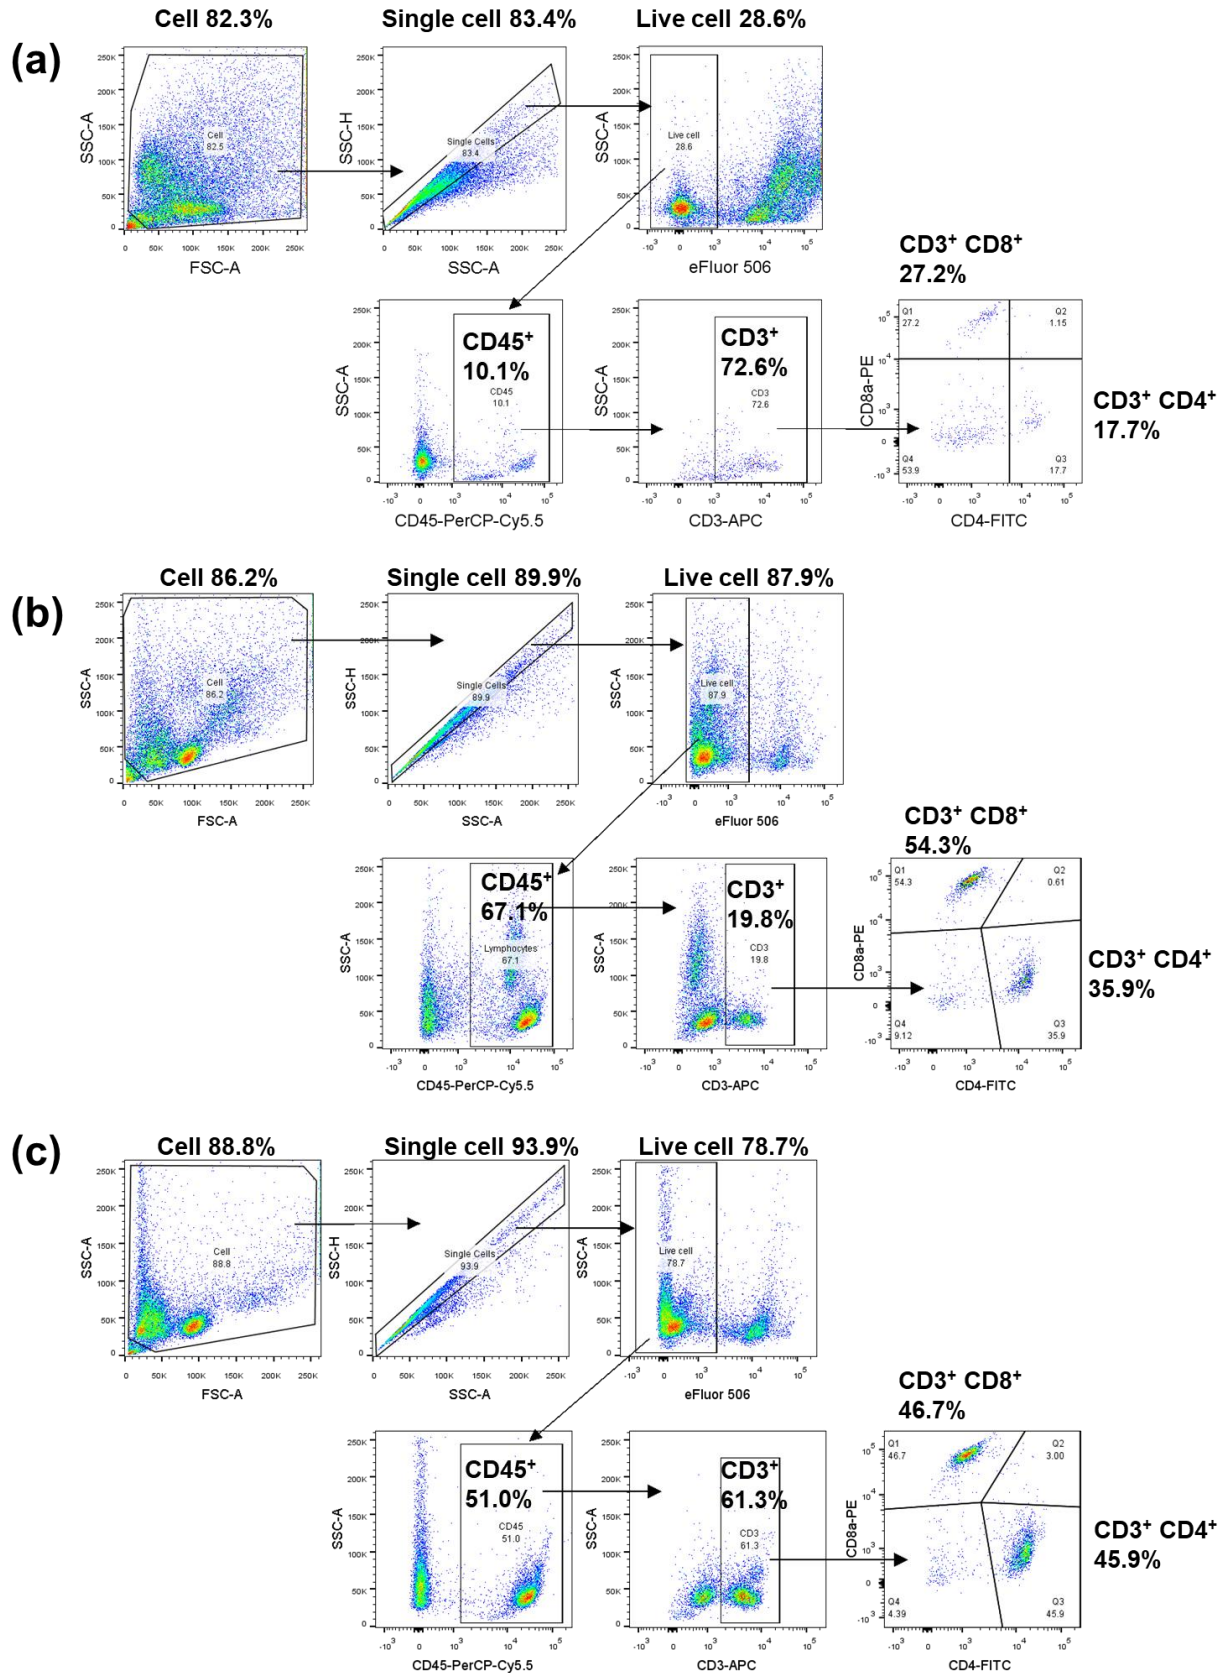

**Figure S18.** Gating strategies to identify CD45<sup>+</sup>CD3<sup>+</sup>CD4<sup>+</sup> and CD45<sup>+</sup>CD3<sup>+</sup>CD8<sup>+</sup> T lymphocytes in the tumor, spleen and lymph nodes of 4T1 tumor-bearing mice following the SnSNPs@PEG-mediated treatment strategy. (a) tumor, (b) spleen and (c) lymph node. Single live cells were first gated, followed by a selection of CD45<sup>+</sup>CD3<sup>+</sup> T lymphocytes. Subsequently, the populations of CD45<sup>+</sup>CD3<sup>+</sup>CD4<sup>+</sup> and CD45<sup>+</sup>CD3<sup>+</sup>CD8<sup>+</sup> T lymphocytes were distinguished and analyzed.

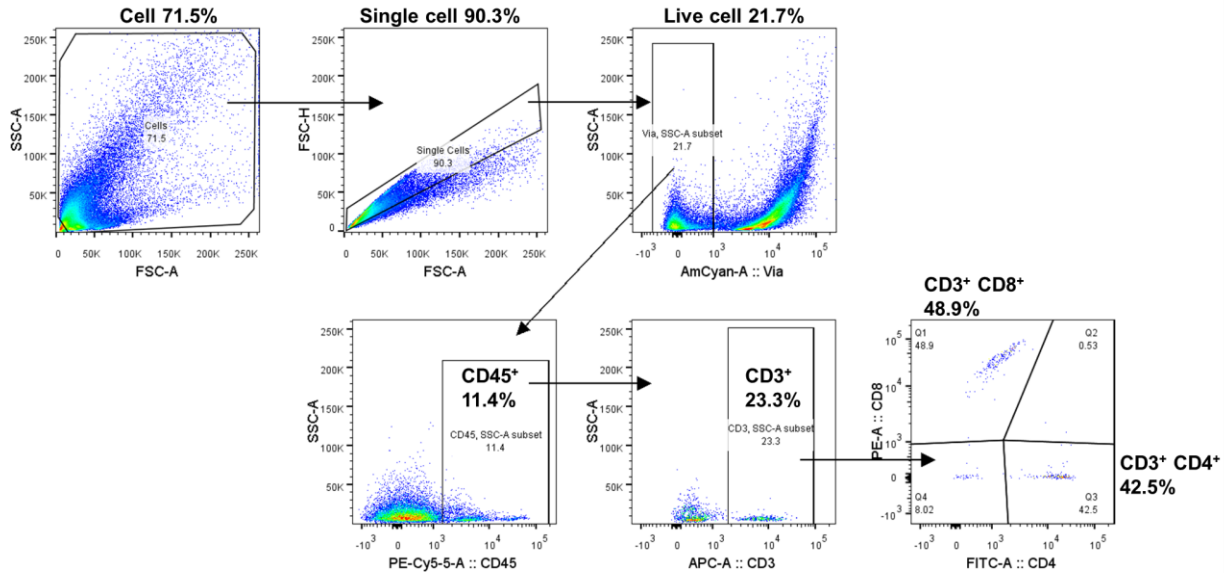

**Figure S19.** Gating strategy to identify CD45<sup>+</sup>CD3<sup>+</sup>CD4<sup>+</sup> and CD45<sup>+</sup>CD3<sup>+</sup>CD8<sup>+</sup> T lymphocytes in the RIL-175-HCC following the SnSNPs@PEG-mediated treatment strategy. Single live cells were first gated, followed by a selection of CD45<sup>+</sup>CD3<sup>+</sup> T lymphocytes. Subsequently, the populations of CD45<sup>+</sup>CD3<sup>+</sup>CD4<sup>+</sup> and CD45<sup>+</sup>CD3<sup>+</sup>CD8<sup>+</sup> T lymphocytes were distinguished and analyzed.



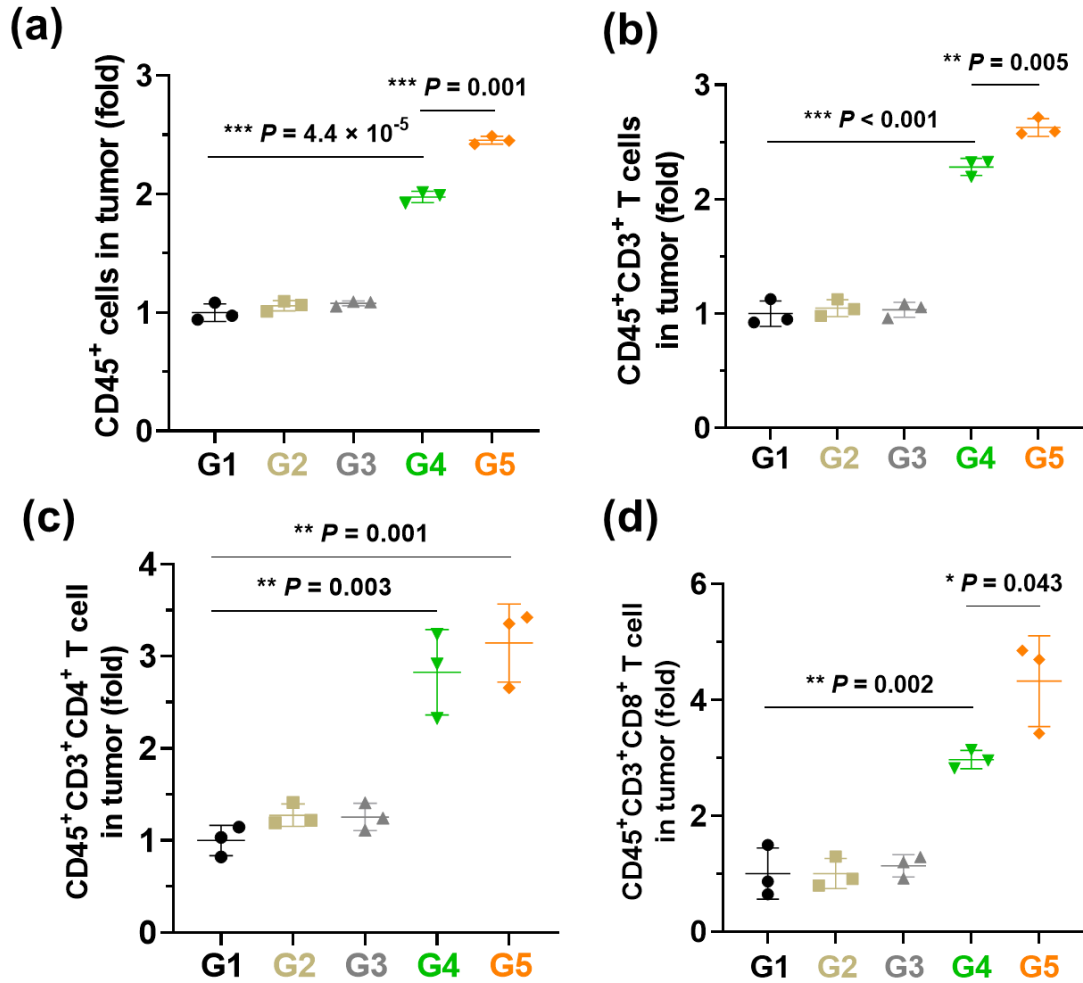

**Figure S20.** Comparison of immune cell levels in 4T1 tumors in different groups after SnSNPs@PEG-mediated treatment strategy. (a) CD45<sup>+</sup> immune cells, (b) CD45<sup>+</sup>CD3<sup>+</sup> T cells, (c) CD45<sup>+</sup>CD3<sup>+</sup>CD4<sup>+</sup> T cells, and (d) CD45<sup>+</sup>CD3<sup>+</sup>CD8<sup>+</sup> T cells in tumors after various treatments. Data are presented as mean  $\pm$  SD (n = 3). Statistical analysis between two groups was performed using two-sided student's *t*-test. \*  $P < 0.05$ , \*\*  $P < 0.01$ , \*\*\*  $P < 0.001$ . Groups are as follows: control (G1), NIR + US (G2), SnSNPs@PEG (G3), SnSNPs@PEG + US (G4), SnSNPs@PEG + NIR + US (G5), (n = 3).

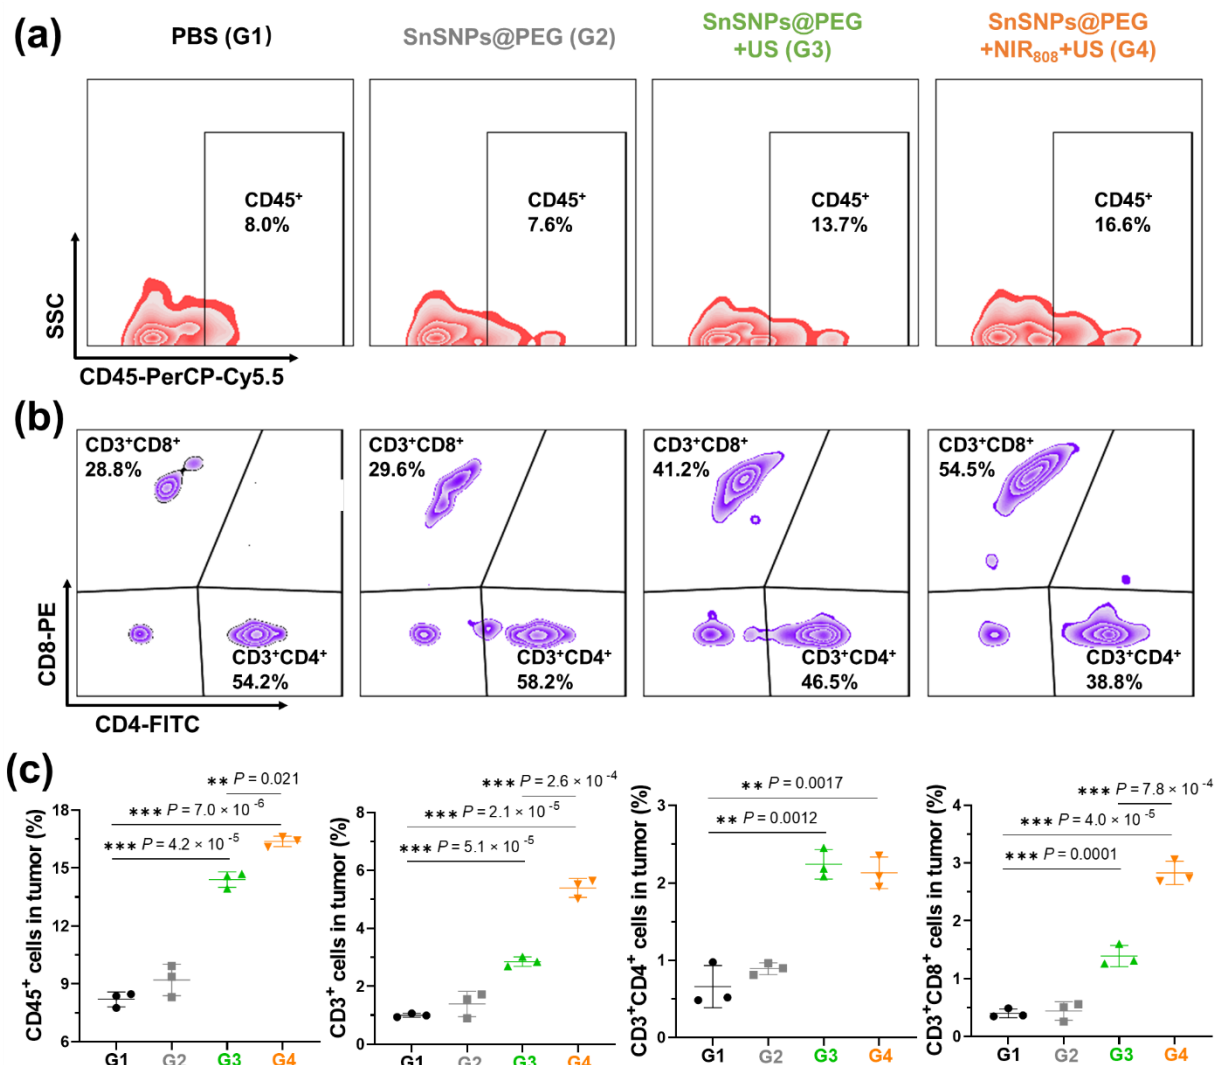

**Figure S21.** Flow cytometry analysis of (a) CD45<sup>+</sup> cells, (b)(c) CD45<sup>+</sup>CD3<sup>+</sup> lymphocytes, CD45<sup>+</sup>CD3<sup>+</sup>CD4<sup>+</sup> T lymphocytes and CD45<sup>+</sup>CD3<sup>+</sup>CD8<sup>+</sup> T lymphocytes in RIL-175-HCC after different treatments (n = 3). Statistical analysis between two groups was performed using two-sided student's *t*-test. Data are presented as mean  $\pm$  SD (n = 3) \*  $P < 0.05$ , \*\*  $P < 0.01$ , \*\*\*  $P < 0.001$ . Groups are as follows: control (G1), SnSNPs@PEG (G2), SnSNPs@PEG + US (G3), SnSNPs@PEG + NIR + US (G4), (n = 3).



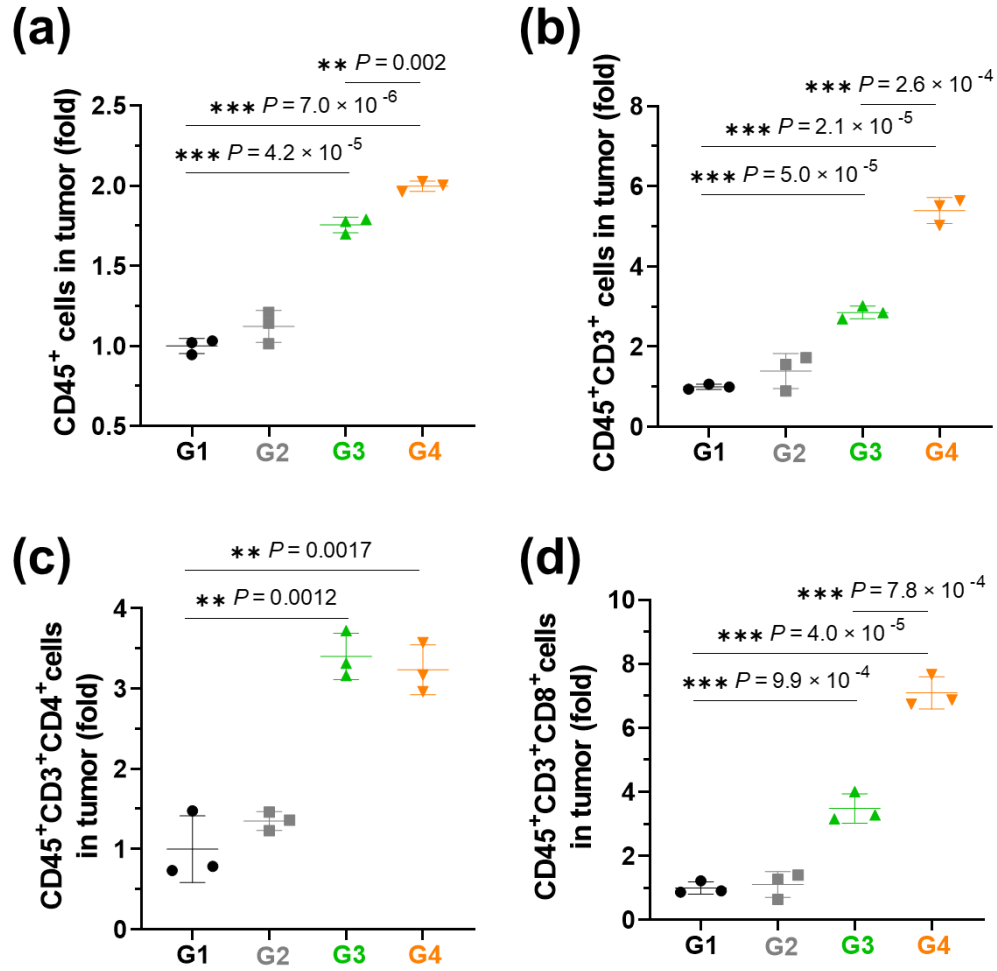

**Figure S22.** Comparison of the levels of (a) CD45<sup>+</sup> immune cells, (b) CD45<sup>+</sup>CD3<sup>+</sup> T cells, (c) CD45<sup>+</sup>CD3<sup>+</sup>CD4<sup>+</sup> T cells, and (d) CD45<sup>+</sup>CD3<sup>+</sup>CD8<sup>+</sup> T cells in RIL-175-HCC-bearing mice after various treatments (n = 3). Statistical analysis between two groups was performed using two-sided student's *t*-test. Data are presented as mean ± SD (n = 3). \*  $P < 0.05$ , \*\*  $P < 0.01$ , \*\*\*  $P < 0.001$ . Groups are as follows: control (G1), SnSNPs@PEG (G2), SnSNPs@PEG + US (G3), SnSNPs@PEG + NIR + US (G4), (n = 3).

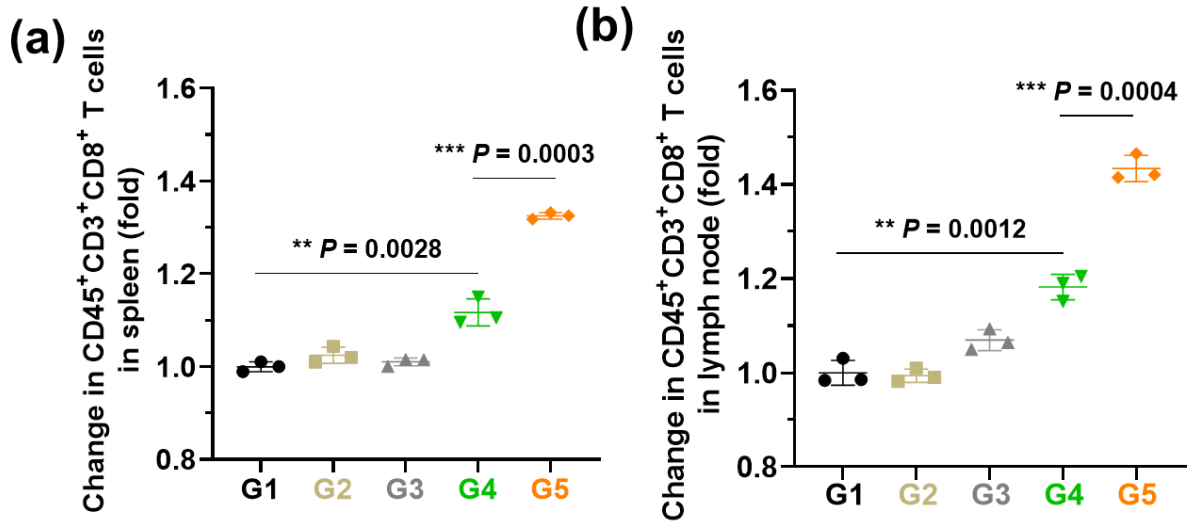

**Figure S23.** Comparison of CD45<sup>+</sup>CD3<sup>+</sup>CD8<sup>+</sup> T cell levels in spleens and lymph nodes of 4T1 tumor-bearing mice in different groups after SnSNPs@PEG-mediated treatment strategy. (a) spleens and (b) lymph nodes of tumor-bearing mice after various treatments. Statistical analysis between two groups was performed using two-sided student's *t*-test. Data are presented as mean  $\pm$  SD (*n* = 3) \* *P* < 0.05, \*\* *P* < 0.01, \*\*\* *P* < 0.001. Groups are as follows: control (G1), NIR + US (G2), SnSNPs@PEG (G3), SnSNPs@PEG + US (G4), SnSNPs@PEG + NIR + US (G5), (*n* = 3).

**Table S1.** Comparison of the bandgap of SnSNPs with other nano-sonosensitizers.

| <i>Sonosensitizer</i>                                     | <i>Structure</i>         | <i>Reported bandgap</i> | <i>Reference</i> |
|-----------------------------------------------------------|--------------------------|-------------------------|------------------|
| <i>SnS</i>                                                | Nanoparticle             | 1.18 eV                 | This work        |
| <i>Bi@BiO<sub>2-x</sub>@Bi<sub>2</sub>S<sub>3</sub></i>   | Nanoparticle             | 1.43 eV                 | 1                |
| <i><math>\alpha</math>-Fe<sub>2</sub>O<sub>3</sub>@Pt</i> | Heterostructure particle | 1.83 eV                 | 2                |
| <i>WO<sub>x</sub></i>                                     | Nanobelt                 | 2.11 eV                 | 3                |
| <i>Ti(Oi-Pr)<sub>4</sub>@Ag</i>                           | Metal–organic framework  | 2.11 eV                 | 4                |
| <i>Sn</i>                                                 | Nanosheet                | 2.3 eV                  | 5                |
| <i>BiVO<sub>4</sub></i>                                   | Nanorod                  | 2.5 eV                  | 6                |
| <i>Vanadium carbide</i>                                   | Carbon dot               | 2.57 eV                 | 7                |
| <i>Sodium molybdenum bronze</i>                           | Nanoparticle             | 2.7 eV                  | 8                |
| <i>TiH<sub>1.924</sub></i>                                | Nanodot                  | 2.7 eV                  | 9                |
| <i>TiO<sub>2</sub></i>                                    | Nanoparticle             | 3.2 eV                  | 10               |

**Table S2.** Antibody used for the flow cytometry analysis of T cells.

| <b>Antibody</b>                    | <b>Brand and Catalog #</b>      | <b>Concentration for use</b> |
|------------------------------------|---------------------------------|------------------------------|
| TruStain FcX™ (anti-mouse CD16/32) | Miltenyi Biotec;<br>130-092-575 | 1.0 µg/mL                    |
| PerCP/Cyanine5.5 anti-mouse CD45   | BioLegend; 109828               | 2.0 µg/mL                    |
| APC anti-mouse CD3                 | BioLegend; 100236               | 2.5 µg/mL                    |
| FITC anti-mouse CD4                | BioLegend; 100406               | 1.5 µg/mL                    |
| PE anti-mouse CD8                  | BioLegend; 100708               | 1.5 µg/mL                    |

## Reference

1. Song, K., *et al.* Biodegradable Bismuth-Based Nano-Heterojunction for Enhanced Sonodynamic Oncotherapy through Charge Separation Engineering. *Adv. Healthc. Mater.* **11**, e2102503 (2022).
2. Zhang, T., *et al.*  $\alpha$ -Fe<sub>2</sub>O<sub>3</sub>@Pt heterostructure particles to enable sonodynamic therapy with self-supplied O<sub>2</sub> and imaging-guidance. *J. Nanobiotechnology* **19**, 358 (2021).
3. Zhou, Y., *et al.* Oxygen-Deficient Tungsten Oxide (WO<sub>x</sub>) Nanobelts with pH-Sensitive Degradation for Enhanced Sonodynamic Therapy of Cancer. *ACS Nano* **16**, 17242-17256 (2022).
4. Meng, X., *et al.* Ag-Doped Metal-Organic Frameworks' Heterostructure for Sonodynamic Therapy of Deep-Seated Cancer and Bacterial Infection. *ACS Nano* **17**, 1174–1186 (2023).
5. Chen, W., *et al.* Stanene-Based Nanosheets for  $\beta$ -Elemene Delivery and Ultrasound-Mediated Combination Cancer Therapy. *Angew. Chem. Int. Ed.* **60**, 7155-7164 (2021).
6. Yang, Z., *et al.* Conferring BiVO<sub>4</sub> Nanorods with Oxygen Vacancies to Realize Enhanced Sonodynamic Cancer Therapy. *Angew. Chem. Int. Ed.* **61**, e202209484 (2022).
7. Wang, H., *et al.* A MXene-derived redox homeostasis regulator perturbs the Nrf2 antioxidant program for reinforced sonodynamic therapy. *Chem. Sci.* **13**, 6704-6714 (2022).
8. He, X., *et al.* NIR-II photo-amplified sonodynamic therapy using sodium molybdenum bronze nanoplatform against subcutaneous Staphylococcus aureus infection. *Adv. Funct. Mater.* **32**, 2203964 (2022).
9. Gong, F., *et al.* Preparation of TiH<sub>1.924</sub> nanodots by liquid-phase exfoliation for enhanced sonodynamic cancer therapy. *Nat. Commun.* **11**, 3712 (2020).
10. George, S., *et al.* Role of Fe doping in tuning the band gap of TiO<sub>2</sub> for the photo-oxidation-induced cytotoxicity paradigm. *J. Am. Chem. Soc.* **133**, 11270-11278 (2011).
